# Supplementary figures and images for: Multi-element co-doped biomass porous carbon with uniform cellular pores as a supercapacitor electrode material to realise high value-added utilisation of agricultural waste
Source: Royal Society of Chemistry journal article supplement (doi:10.1039/d2dt01750d), 2022-01-01

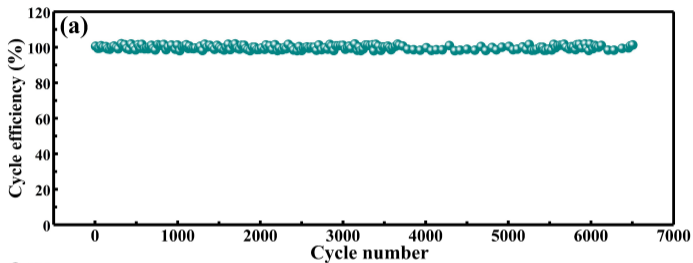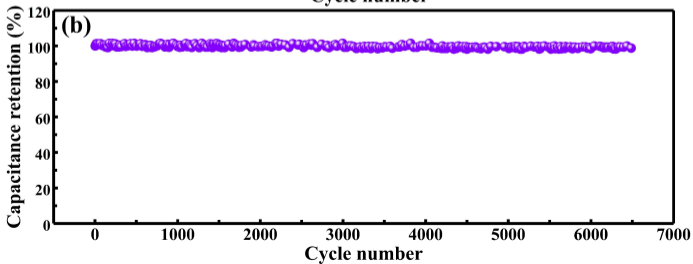

Supplement: d2dt01750d2.pdf [file d2dt01750d2.pdf]

Support Information

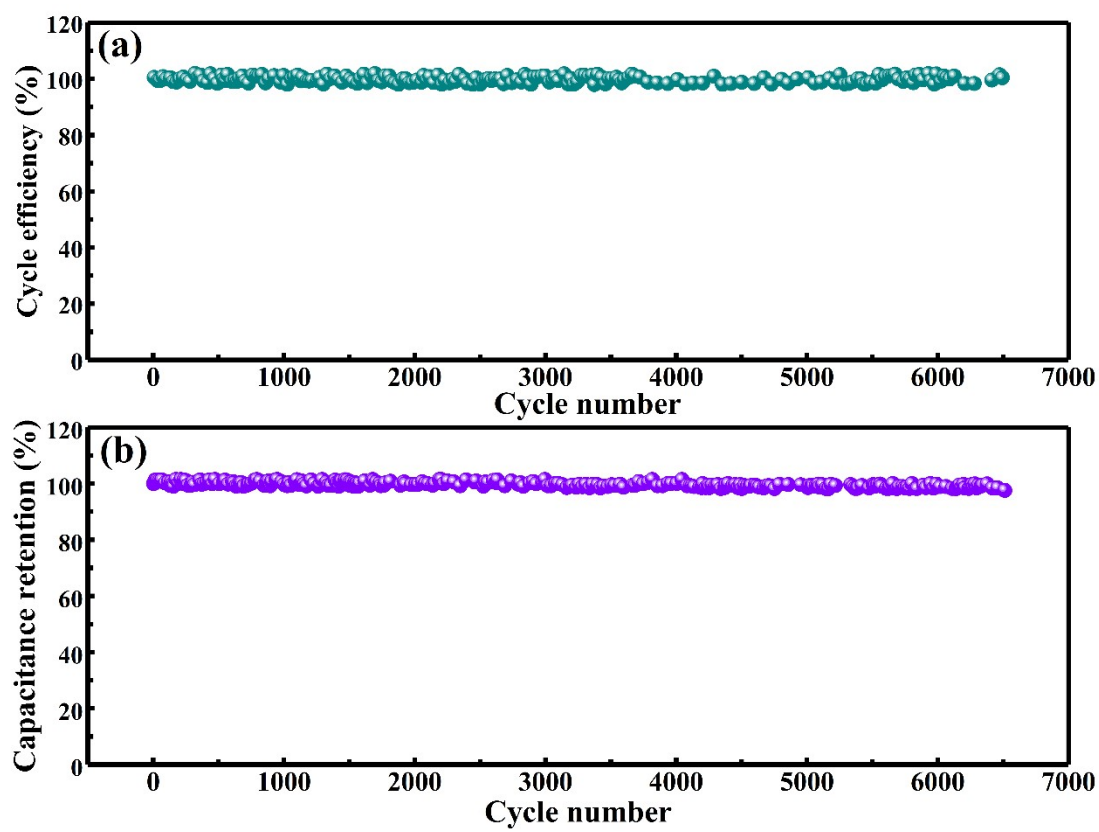

Fig. S1 (a) cycle efficiency and (b) capacitance retention of B-N-P-CSC //B-N-P-CSC-1.

Supplement: d2dt01750d3.pdf [file d2dt01750d3.pdf]
